# Supplementary material for: Cellulose nanofiber-assisted dispersion of cellulose nanocrystals@polyaniline in water and its conductive films
Source: Royal Society of Chemistry journal article supplement (doi:10.1039/c5ra19346j), 2016-01-01
Supplement: c5ra19346j1.pdf [file c5ra19346j1.pdf]

## SUPPORTING INFORMATION

### **Cellulose Nanofiber-assisted Dispersion of Cellulose Nanocrystals@polyaniline in Water and its Conductive Films**

*Shiqi Wang<sup>3</sup>, Chun Wei<sup>\*1,2,3</sup>, Yongyang Gong<sup>1,2,3</sup>, Jian Lv<sup>1,2,3</sup>, Chuanbai Yu<sup>1,2,3</sup>, Jinhong Yu<sup>\*1,4</sup>*

*<sup>1</sup> Ministry-province jointly-constructed cultivation base for state key laboratory of processing for non-ferrous metal and featured materials, Guangxi Zhuang Autonomous Region*

*<sup>2</sup> Key Laboratory of New Processing Technology for Nonferrous Metals and Materials, Ministry of Education*

*<sup>3</sup> College of Materials Science and Engineering, Guilin University of Technology, Guilin 541004, P. R. China*

*<sup>4</sup> Key Laboratory of Marine Materials and Related Technologies, Zhejiang Key Laboratory of Marine Materials and Protective Technologies, Ningbo Institute of Materials Technology and Engineering, Chinese Academy of Sciences, Ningbo 315201, China.*

*\*Corresponding author, E-mail: [1986024@glut.edu.cn](mailto:1986024@glut.edu.cn) (Chun Wei), [yujinhong@nimte.ac.cn](mailto:yujinhong@nimte.ac.cn) (Jinhong Yu)*

## SUPPLEMENT

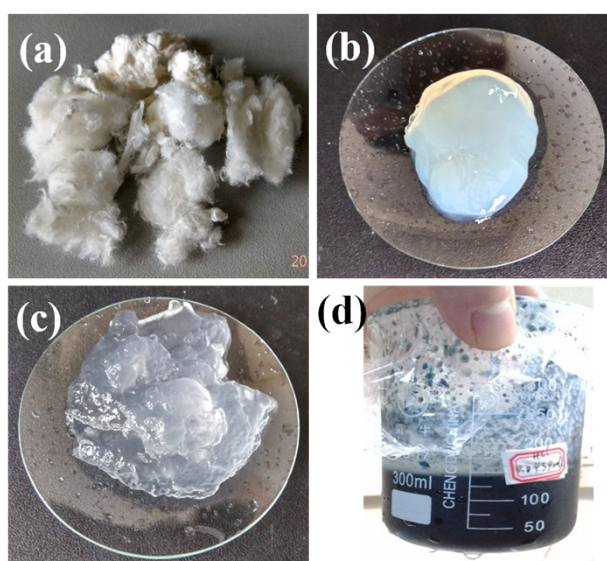

**Figure S1.** The digital photograph of raw materials and byproduct: (a) sisal pulp, (b) CNC, (c) CNF, (d) CNC@PANI.

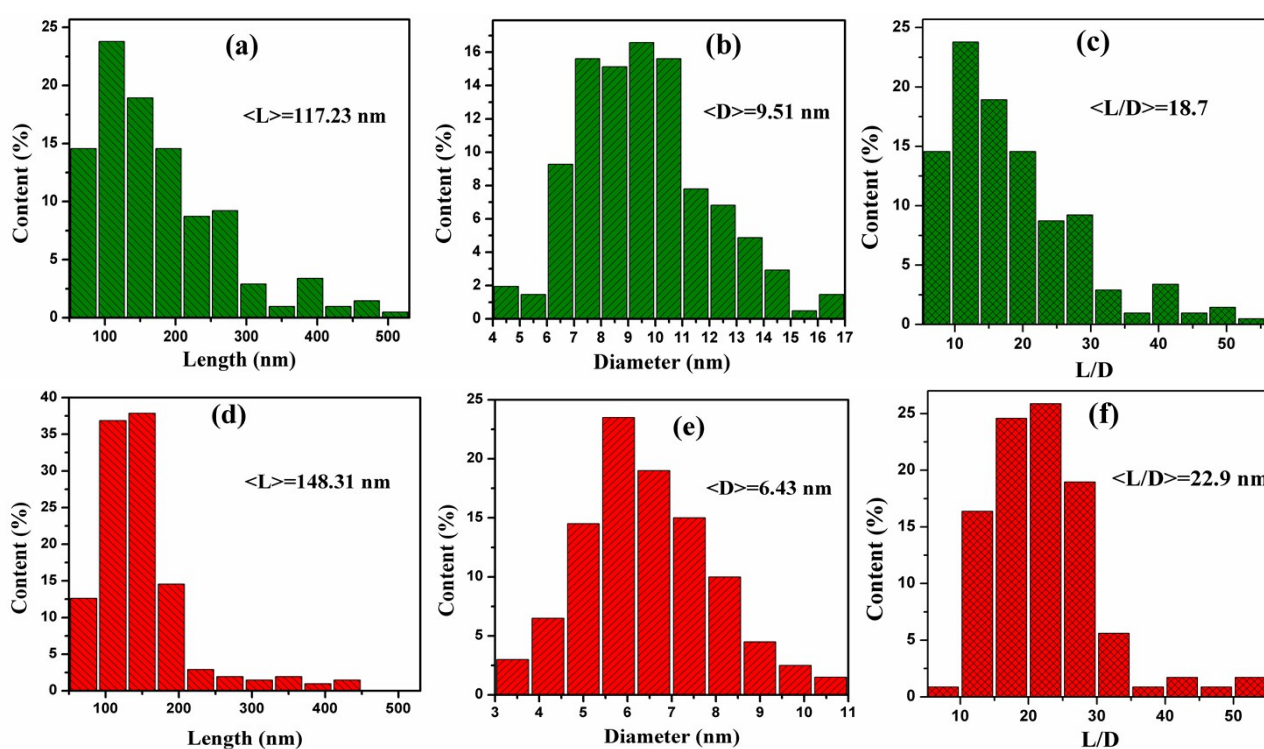

**Figure S2.** Histograms of measured values for CNC (a-c) and CNF (d-f): length (a, d), diameter (b, e), length over diameter (c, f).
